# Supplementary material for: An effective strategy to achieve deeper coherent light for LiB3O5
Source: Royal Society of Chemistry journal article supplement (doi:10.1039/c5tc03814f), 2016-01-01
Supplement: c5tc03814f1.pdf [file c5tc03814f1.pdf]

## Supplementary Information

### An effective strategy to achieve deeper coherent light for

### $\text{LiB}_3\text{O}_5$

Jun Li,<sup>ab</sup> Zuju Ma,<sup>a</sup> Chao He,<sup>ab</sup> Qiaohong Li,<sup>a</sup> and Kechen Wu<sup>\*a</sup>

<sup>a</sup> *State Key Laboratory of Structural Chemistry, Fujian Institute of Research on the Structure of Matter, Chinese Academy of Sciences, Fuzhou 350002, People's Republic of China.*

<sup>b</sup> *University of Chinese Academy of Sciences, Beijing 100049, People's Republic of China*

---

\* Corresponding author. Tel: +86-591-83792600. Fax: +86 591 83792932. E-mail address: wkc@fjirsm.ac.cn.

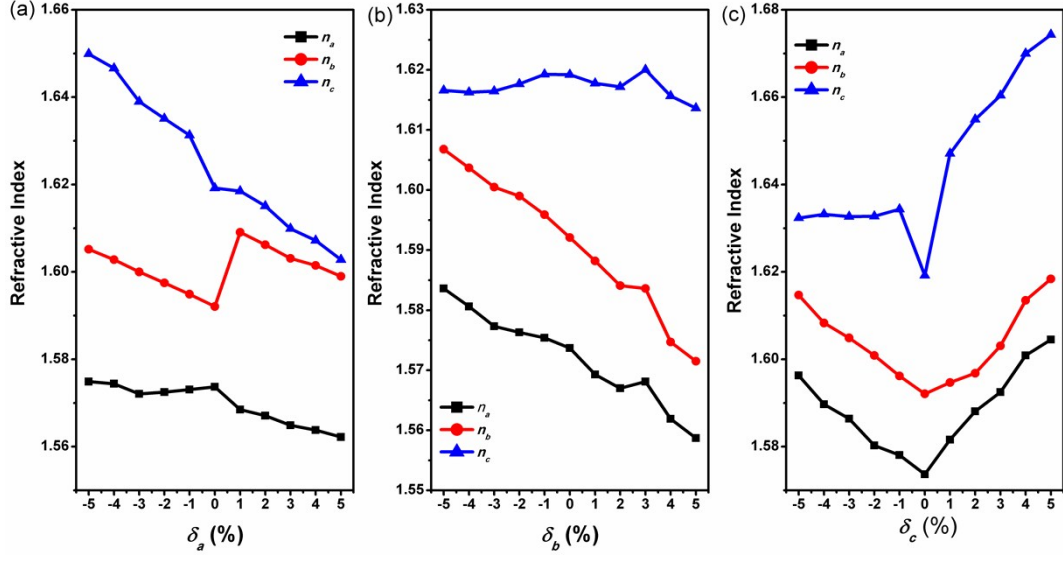

**Fig. S1.** Refractive index of LBO at 1064 nm as a function of strain along  $a$ -axis (a),  $b$ -axis (b),  $c$ -axis (c).

**Table S1** Polarizability anisotropy (a.u.) with strains along  $a$ -,  $b$ - and  $c$ -axis using B3LYP/6-311+G(d) level of theory.

|     | $a$ -axis | $b$ -axis | $c$ -axis |
|-----|-----------|-----------|-----------|
| -5% | 141.65    | 91.86     | 109.84    |
| -3% | 131.32    | 96.22     | 114.07    |
| -1% | 107.68    | 99.01     | 122.76    |
| 1%  | 97.89     | 106.64    | 139.88    |
| 3%  | 95.24     | 113.33    | 150.62    |
| 5%  | 92.58     | 126.19    | 178.10    |
